# Supplementary material for: Production of a chimeric flavivirus that contains the major structural glycoprotein genes of T’Ho virus in the genetic background of Zika virus
Source: Springer Nature journal article supplement (doi:10.1186/s12985-023-02172-2), 2023-09-01

Figure 2A

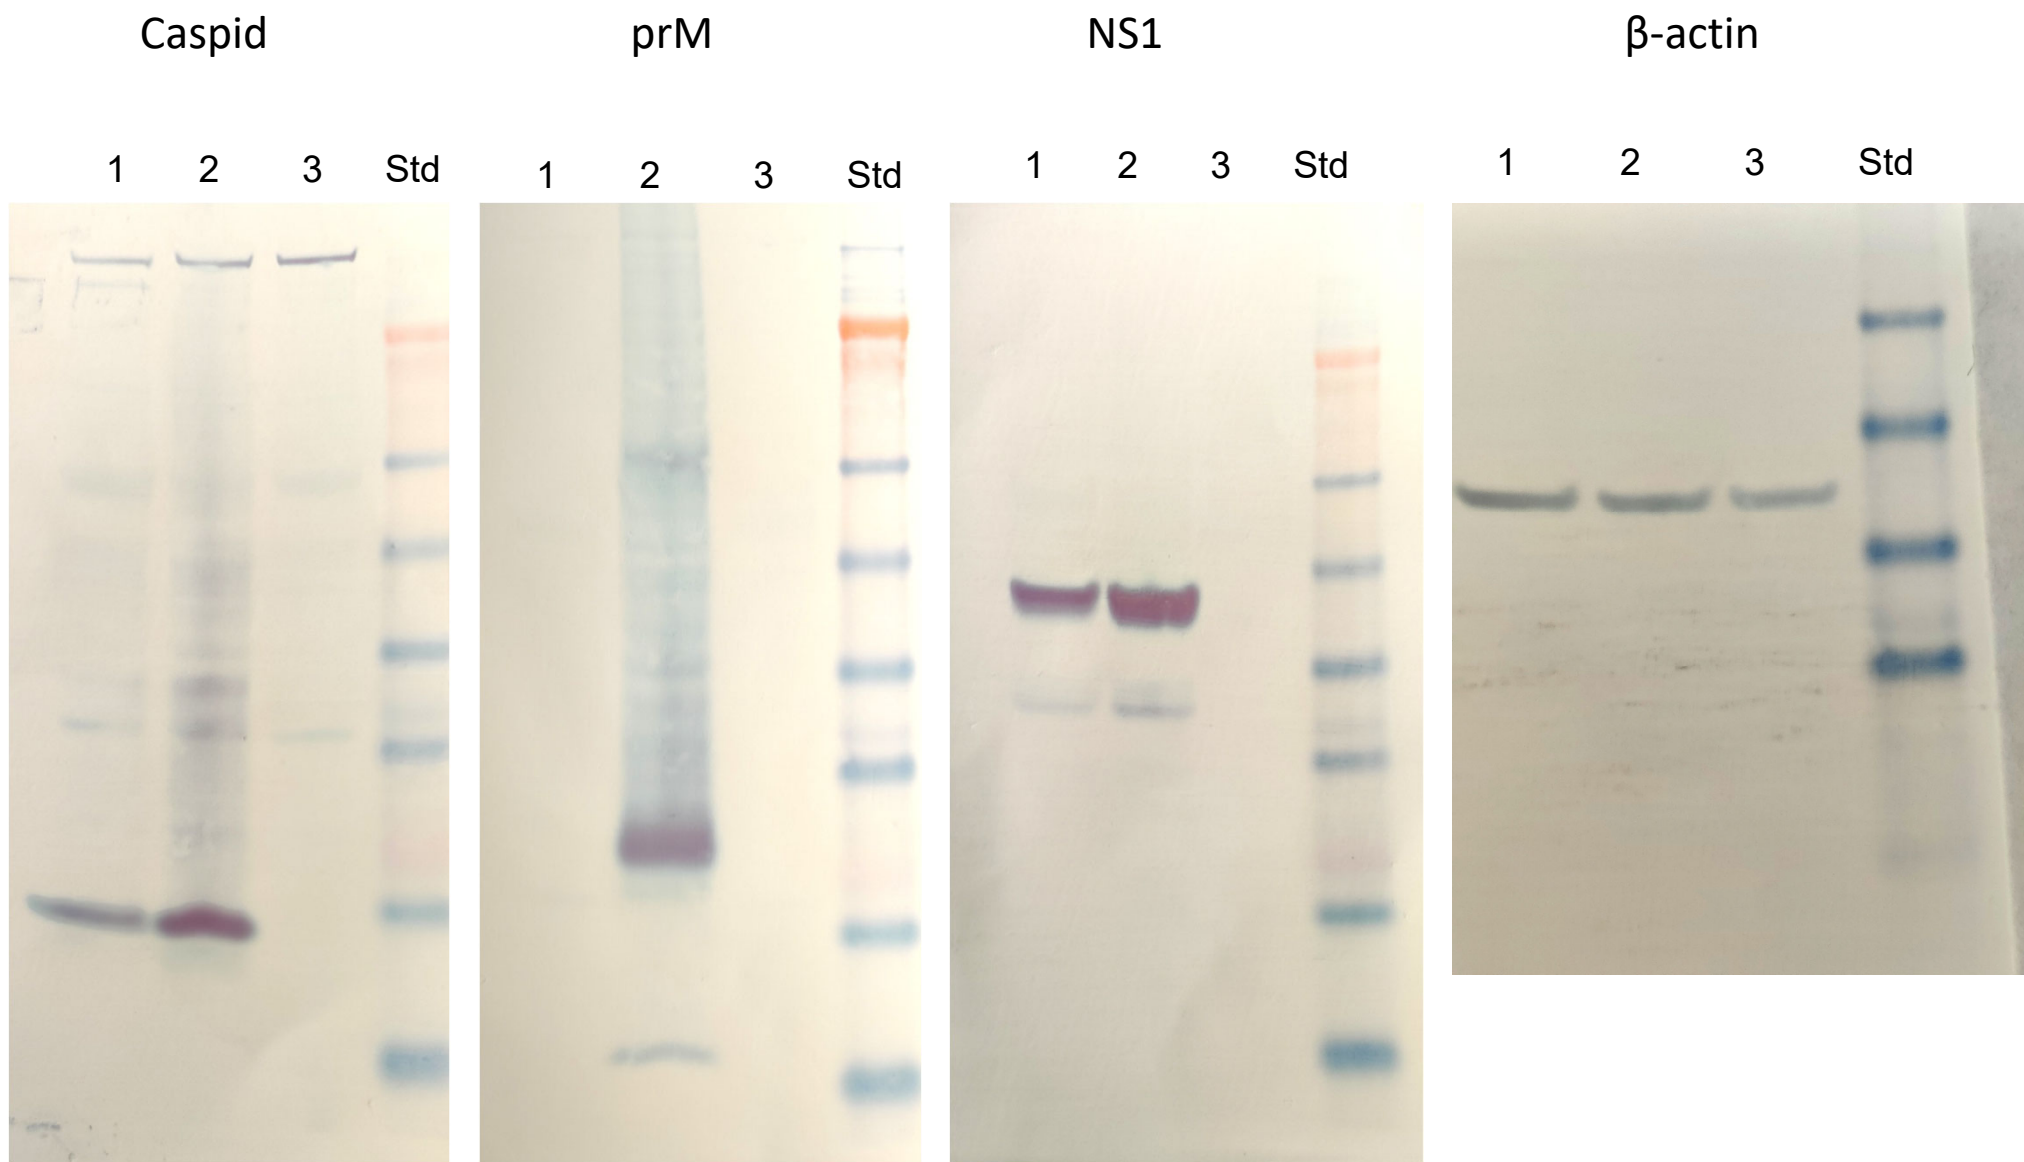

Figure 3A

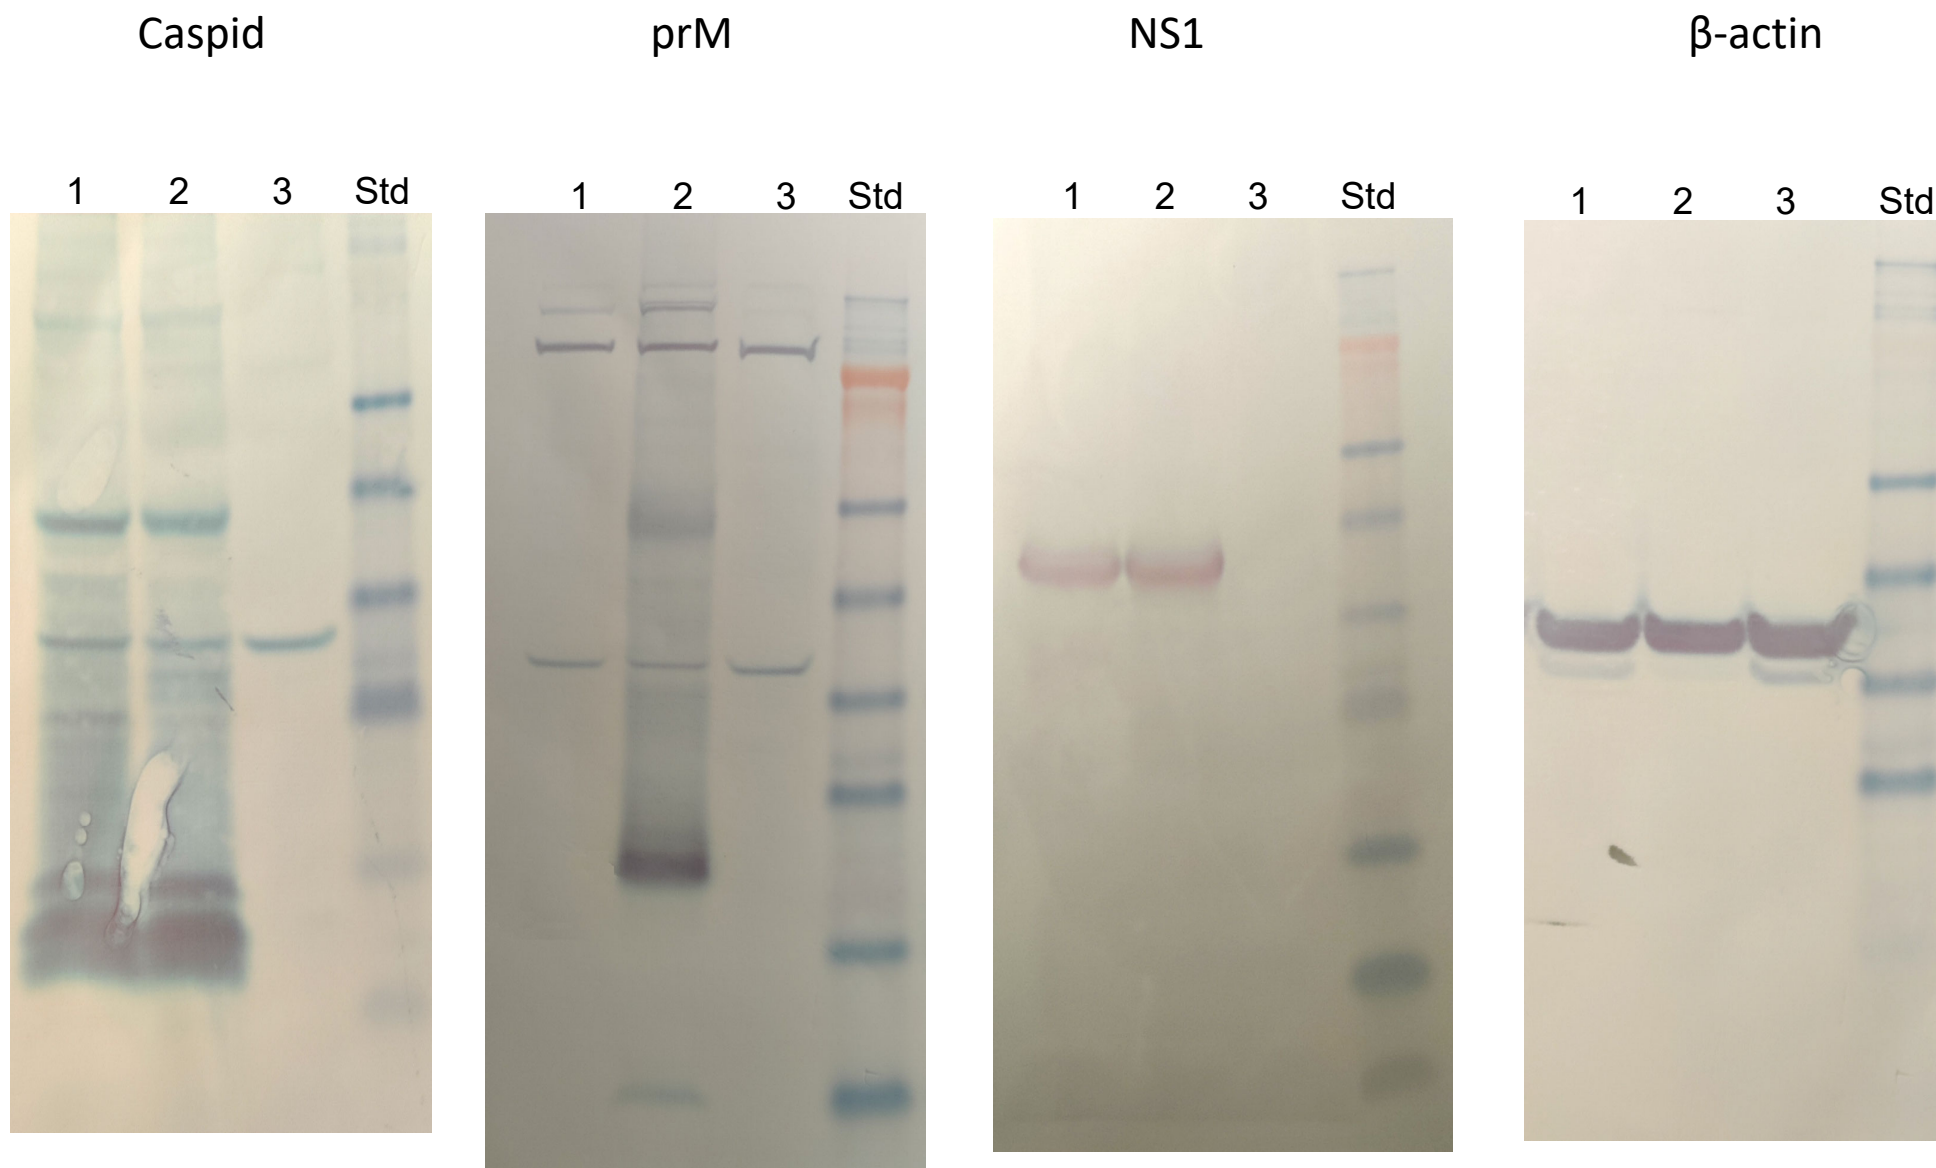

Supplement: MOESM1 [file 25992114]
